# Supplementary material
Source: MDPI journal article supplement (https://www.mdpi.com/2071-1050/14/23/15994)
Supplement: s1 [file sustainability-2026567-supplementary.xlsx]

## Sheet: Sheet1
Table S1: Summary of relevant information regarding the collected publications (listed by type of approach)
Citation	Title	Type of approach	Study area	Data platform	Reference
Anfuso et al. 2021	Coastal Sensitivity/Vulnerability Characterization and Adaptation Strategies: A Review	Coastal adaptation	MED	IPCC	Anfuso, G., Postacchini, M., Di Luccio, D., & Benassai, G. (2021). Coastal sensitivity/vulnerability characterization and adaptation strategies: A review. Journal of Marine Science and Engineering, 9(1), 72.
Aucelli et al. 2019	Linking marine protected areas to integrated coastal and ocean management: A review of theory and practice	Coastal adaptation	Italy	NA	Aucelli, P., Cinque, A., Mattei, G., Pappone, G., & Rizzo, A. (2019). Studying relative sea level change and correlative adaptation of coastal structures on submerged Roman time ruins nearby Naples (southern Italy). Quaternary international, 501, 328-348.
Brisset et al. 2018	Studying relative sea level change and correlative adaptation of coastal structures on submerged Roman time ruins nearby Naples (southern Italy).	Coastal adaptation	Spain	NA	Brisset, E., Burjachs, F., Navarro, B. J. B., & de Pablo, J. F. L. (2018). Socio-ecological adaptation to Early-Holocene sea-level rise in the western Mediterranean. Global and planetary change, 169, 156-167.
Brochier et al. 2001	Climate Change Impacts on the Mediterranean Coastal Zones	Coastal adaptation	MED	IPCC	Brochier, F., & Ramieri, E. (2001). Climate change impacts on the Mediterranean coastal zones. Available at SSRN 277549.
Carapuco et al. 2021	How to foster scientific knowledge integration in coastal management	Coastal adaptation	MED	NA	Carapuço, M. M., Taborda, R., Andrade, C., & de Jonge, V. N. (2021). How to foster scientific knowledge integration in coastal management. Ocean & Coastal Management, 209, 105661.
del Moral et al. 2020	Connecting flash flood events with radar-derived convective storm characteristics on the northwestern Mediterranean coast: knowing the present for better future scenarios adaptation	Coastal adaptation	Spain	IPCC	del Moral, A., del Carmen Llasat, M., & Rigo, T. (2020). Connecting flash flood events with radar-derived convective storm characteristics on the northwestern Mediterranean coast: knowing the present for better future scenarios adaptation. Atmospheric Research, 238, 104863.
Enriquez et al. 2019	Assessing beach and dune erosion and vulnerability under sea level rise: a case study in the Mediterranean Sea	Coastal adaptation	Spain	IPCC	Enríquez, A. R., Marcos, M., Falqués, A., & Roelvink, D. (2019). Assessing beach and dune erosion and vulnerability under sea level rise: a case study in the Mediterranean Sea. Frontiers in Marine Science, 6, 4.
Frihy et al. 2013	Vulnerability risk assessment and adaptation to climate change induced sea level rise along the Mediterranean coast of Egypt	Coastal adaptation	Egypt	IPCC	Frihy, O. E., & El-Sayed, M. K. (2013). Vulnerability risk assessment and adaptation to climate change induced sea level rise along the Mediterranean coast of Egypt. Mitigation and adaptation strategies for global change, 18(8), 1215-1237.
Furlan et al. 2022	Ecosystem services at risk in Italy from coastal inundation under extreme sea level scenarios up to 2050	Coastal adaptation	Italy	IPCC	Furlan, E., Derepasko, D., Torresan, S., Pham, H. V., Fogarin, S., & Critto, A. (2022). Ecosystem services at risk in Italy from coastal inundation under extreme sea level scenarios up to 2050: A spatially resolved approach supporting climate change adaptation. Integrated Environmental Assessment and Management.
Harrison et al. 2013	Combining qualitative and quantitative understanding for exploring cross-sectoral climate change impacts, adaptation and vulnerability in Europe	Coastal adaptation	MED	IPCC	Harrison, P. A., Holman, I. P., Cojocaru, G., Kok, K., Kontogianni, A., Metzger, M. J., & Gramberger, M. (2013). Combining qualitative and quantitative understanding for exploring cross-sectoral climate change impacts, adaptation and vulnerability in Europe. Regional Environmental Change, 13(4), 761-780.
Hinkel et al. 2010	Assessing risk of and adaptation to sea-level rise in the European Union: an application of DIVA	Coastal adaptation	MED	IPCC	Hinkel, J., Nicholls, R. J., Vafeidis, A. T., Tol, R. S., & Avagianou, T. (2010). Assessing risk of and adaptation to sea-level rise in the European Union: an application of DIVA. Mitigation and adaptation strategies for global change, 15(7), 703-719.
Kuhfuss et al. 2016	Evaluating the impacts of sea level rise on coastal wetlands in Languedoc-Roussillon, France	Coastal adaptation	France	IPCC	Kuhfuss, L., Rey-Valette, H., Sourisseau, E., Heurtefeux, H., & Rufray, X. (2016). Evaluating the impacts of sea level rise on coastal wetlands in Languedoc-Roussillon, France. Environmental Science & Policy, 59, 26-34.
Rey-Valette et al. 2015	Second-home owners and sea-level rise: the case of the Languedoc-Roussillon region (France)	Coastal adaptation	France	NA	Rey-Valette, H., Rulleau, B., Hellequin, A. P., Meur-Ferec, C., & Flanquart, H. (2015). Second-home owners and sea-level rise: the case of the Languedoc-Roussillon region (France). Journal of Policy Research in Tourism, Leisure and Events, 7(1), 32-47.
Rodríguez-Santalla et al. 2021	Main Threats in Mediterranean Coastal Wetlands. The Ebro Delta Case	Coastal adaptation	Spain	IPCC	Rodríguez-Santalla, I., & Navarro, N. (2021). Main Threats in Mediterranean Coastal Wetlands. The Ebro Delta Case. Journal of Marine Science and Engineering, 9(11), 1190.
Sanchez-Arcilla et al. 2016	Managing coastal environments under climate change: Pathways to adaptation	Coastal adaptation	Spain	IPCC	Sánchez-Arcilla, A., García-León, M., Gracia, V., Devoy, R., Stanica, A., & Gault, J. (2016). Managing coastal environments under climate change: Pathways to adaptation. Science of the total environment, 572, 1336-1352.
Santos et al. 2014	Impacts and adaptation to climate change in the Mediterranean coastal areas: the CIRCLE-MED initiative	Coastal adaptation	MED	NA	Santos, F. D., Stigter, T. Y., Faysse, N., & Lourenço, T. C. (2014). Impacts and adaptation to climate change in the Mediterranean coastal areas: the CIRCLE-MED initiative. Regional Environmental Change, 14(1), 1-3.
Sarda et al. 2005	A methodological approach to be used in integrated coastal zone management process: the case of the Catalan coast (Catalonia, Spain)	Coastal adaptation	Spain	NA	Sarda, R., Avila, C., & Mora, J. (2005). A methodological approach to be used in integrated coastal zone management processes: the case of the Catalan Coast (Catalonia, Spain). Estuarine, Coastal and Shelf Science, 62(3), 427-439.
Sauer et al. 2022	Beach Users’ Perceptions of coastal regeneration Projects as an adaptation strategy in the Western Mediterranean	Coastal adaptation	France	IPCC	Sauer, I., Roca, E., & Villares, M. (2022). Beach users’ perceptions of coastal regeneration projects as an adaptation strategy in the western Mediterranean. Journal of Hospitality & Tourism Research, 46(3), 418-441.
Antonioli et al. 2017	Sea level rise and potential drowning of the Italian coastal plain : Flooding risk scenarios for 2100	Coastal risk assessment	Italy	IPCC	Antonioli, F., Anzidei, M., Amorosi, A. L. E. S. S. A. N. D. R. O., Presti, V. L., Mastronuzzi, G., Deiana, G., ... & Vecchio, A. (2017). Sea-level rise and potential drowning of the Italian coastal plains: Flooding risk scenarios for 2100. Quaternary Science Reviews, 158, 29-43.
Antonioli et al. 2020	Relative Sea-Level Rise and Potential Submersion Risk for 2100 on 16 Coastal Plains of the Mediterranean Sea	Coastal risk assessment	Italy, Spain, Egypt	IPCC, COPERNICUS	Antonioli, F., De Falco, G., Lo Presti, V., Moretti, L., Scardino, G., Anzidei, M., ... & Mastronuzzi, G. (2020). Relative sea-level rise and potential submersion risk for 2100 on 16 coastal plains of the Mediterranean sea. Water, 12(8), 2173.
Anzidei et al. 2017	Flooding scenarios due to land subsidence and sea-level rise: a case study	Coastal risk assessment	Italy	IPCC	Anzidei, M., Bosman, A., Carluccio, R., Casalbore, D., D'Ajello Caracciolo, F., Esposito, A., ... & Sepe, V. (2017). Flooding scenarios due to land subsidence and sea‐level rise: a case study for Lipari Island (Italy). Terra Nova, 29(1), 44-51.
Anzidei et al. 2018	Coastal retreat and marine flooding scenario for 2100: a case study along the coast of Maddalena peninsula (southeastern Sicily)	Coastal risk assessment	Italy	IPCC	Anzidei, M., Scicchitano, G., Tarascio, S., De Guidi, G., Monaco, C., Barreca, G., ... & Vecchio, A. (2018). Coastal retreat and marine flooding scenario for 2100: A case study along the coast of Maddalena Peninsula (southeastern Sicily). Geogr. Fis. Din. Quat, 41, 5-16.
Armaroli et al. 2018	Validation of coastal storm risk assessment framework along the Emilia-Romagna coast	Coastal risk assessment	Italy	NA	Armaroli, C., & Duo, E. (2018). Validation of the coastal storm risk assessment framework along the Emilia-Romagna coast. Coastal Engineering, 134, 159-167.
Aucelli et al. 2017	Coastal inundation risk assessment due to subsidence and sea level rise in a Mediterranean alluvial plain (Volturno coastal plain- southern Italy)	Coastal risk assessment	Italy	IPCC	Aucelli, P. P. C., Di Paola, G., Incontri, P., Rizzo, A., Vilardo, G., Benassai, G., ... & Pappone, G. (2017). Coastal inundation risk assessment due to subsidence and sea level rise in a Mediterranean alluvial plain (Volturno coastal plain–southern Italy). Estuarine, Coastal and Shelf Science, 198, 597-609.
Ballesteros et al. 2018	A multi-component ﬂood risk assessment in the Maresme coast (NW Mediterranean)	Coastal risk assessment	Spain	IPCC	Ballesteros, C., Jiménez, J. A., & Viavattene, C. (2018). A multi-component flood risk assessment in the Maresme coast (NW Mediterranean). Natural Hazards, 90(1), 265-292.
Benassai et al. 2015	Coastal risk assessment of micro-tidal littoral plain in response to sea level rise	Coastal risk assessment	Italy	IPCC	Benassai, G., Di Paola, G., & Aucelli, P. P. C. (2015). Coastal risk assessment of a micro-tidal littoral plain in response to sea level rise. Ocean & Coastal Management, 104, 22-35.
Bonaldo et al. 2019	Integrating multidisciplinary instruments for assessing coastal vulnerability to erosion and sea level rise: lessons and challenges from the Adriatic Sea, Italy	Coastal risk assessment	Italy	IPCC	Bonaldo, D., Antonioli, F., Archetti, R., Bezzi, A., Correggiari, A., Davolio, S., ... & Carniel, S. (2019). Integrating multidisciplinary instruments for assessing coastal vulnerability to erosion and sea level rise: Lessons and challenges from the Adriatic Sea, Italy. Journal of coastal conservation, 23(1), 19-37.
Bosom et al. 2010	Storm-induced coastal hazard assessment at regional scale: application to Catalonia (NW Mediterranean)	Coastal risk assessment	Spain	NA	Bosom, E., & Jiménez, J. A. (2010). Storm-induced coastal hazard assessment at regional scale: application to Catalonia (NW Mediterranean). Advances in Geosciences, 26, 83-87.
Segrelles et al. 2021	Risk assessment of climate change impacts on Mediterranean coastal wetlands: Application in Jucar river basin district Spain	Coastal risk assessment	Spain	IPCC	Estrela-Segrelles, C., Gómez-Martinez, G., & Pérez-Martín, M. Á. (2021). Risk assessment of climate change impacts on Mediterranean coastal wetlands. Application in Júcar River Basin District (Spain). Science of the Total Environment, 790, 148032.
Clemente et al. 2022	The proposal of the Coast-Risk By Sea: COASTAL zones RISK assessment for Built environment by extreme SEA level, based on the new Copernicus Coastal Zones data	Coastal risk assessment	Italy	COPERNICUS	Clemente, M. F., D'Ambrosio, V., & Focareta, M. (2022). The proposal of the Coast-RiskBySea: COASTal zones RISK assessment for Built environment bY extreme SEA level, based on the new Copernicus Coastal Zones data. International Journal of Disaster Risk Reduction, 75, 102947.
Di Paola et al. 2021	Sea‑level rise impact and future scenarios of inundation risk along the coastal plains in Campania (Italy)	Coastal risk assessment	Italy	IPCC	Di Paola, G., Rizzo, A., Benassai, G., Corrado, G., Matano, F., & Aucelli, P. P. (2021). Sea-level rise impact and future scenarios of inundation risk along the coastal plains in Campania (Italy). Environmental Earth Sciences, 80(17), 1-22.
Ferrari et al. 2019	A geomorphological and hydrodynamic approach for beach safety and sea bathing risk estimation	Coastal risk assessment	Italy	NA	Ferrari, M., Carpi, L., Pepe, G., Mucerino, L., Schiaffino, C. F., Brignone, M., & Cevasco, A. (2019). A geomorphological and hydrodynamic approach for beach safety and sea bathing risk estimation. Science of The Total Environment, 671, 1214-1226.
Furlan et al. 2022	Ecosystem services at risk in Italy from coastal inundation under extreme sea level scenarios upto 2050: A spatially resolved approach supporting climate change adaptation	Coastal risk assessment	Italy	IPCC	Furlan, E., Derepasko, D., Torresan, S., Pham, H. V., Fogarin, S., & Critto, A. (2022). Ecosystem services at risk in Italy from coastal inundation under extreme sea level scenarios up to 2050: A spatially resolved approach supporting climate change adaptation. Integrated Environmental Assessment and Management.
Lopez-Doriga et al. 2020	Impact of Relative Sea-Level Rise on Low-Lying Coastal Areas of Catalonia, NW Mediterranean, Spain	Coastal risk assessment	Spain	IPCC	López-Dóriga, U., & Jiménez, J. A. (2020). Impact of relative sea-level rise on low-lying coastal areas of catalonia, nw Mediterranean, Spain. Water, 12(11), 3252.
Martinelli et al. 2010	Assessment of coastal flooding hazard along the Emilia Romagna littoral, IT	Coastal risk assessment	Italy	NA	Martinelli, L., Zanuttigh, B., & Corbau, C. (2010). Assessment of coastal flooding hazard along the Emilia Romagna littoral, IT. Coastal Engineering, 57(11-12), 1042-1058.
Ojeda-Zújar et al. 2021	Sea level rise inundation risk assessment in residential cadastral parcels along the Mediterranean and Alusian coast	Coastal risk assessment	Spain	IPCC	Ojeda-Zújar, J., Fraile-Jurado, P., & Álvarez-Francoso, J. (2021). Sea level rise inundation risk assessment in residential cadastral parcels along the Mediterranean Andalusian coast. Cuadernos de Investigación Geográfica, 47(1), 243-263.
Reimann et al. 2018	Mediterranean UNESCO World Heritage at risk from coastal ﬂooding and erosion due to sea-level rise	Coastal risk assessment	MED	IPCC	Reimann, L., Vafeidis, A. T., Brown, S., Hinkel, J., & Tol, R. S. (2018). Mediterranean UNESCO World Heritage at risk from coastal flooding and erosion due to sea-level rise. Nature communications, 9(1), 1-11.
Rizzi et al. 2017	Assessing storm surge risk under future sea-level rise scenarios: a case study in the North Adriatic coast	Coastal risk assessment	Italy	IPCC	Rizzi, J., Torresan, S., Zabeo, A., Critto, A., Tosoni, A., Tomasin, A., & Marcomini, A. (2017). Assessing storm surge risk under future sea-level rise scenarios: A case study in the North Adriatic coast. Journal of Coastal Conservation, 21(4), 453-471.
Rizzo et al. 2022	Potential Sea Level Rise Inundation in the Mediterranean: From Susceptibility Assessment to Risk Scenarios for Policy Action	Coastal risk assessment	Malta	IPCC	Rizzo, A., Vandelli, V., Gauci, C., Buhagiar, G., Micallef, A. S., & Soldati, M. (2022). Potential Sea Level Rise Inundation in the Mediterranean: From Susceptibility Assessment to Risk Scenarios for Policy Action. Water, 14(3), 416.
Sanuy et al. 2018	Linking source with consequences of coastal storm impacts for climate change and risk reduction scenarios for Mediterranean sandy beaches	Coastal risk assessment	Spain	NA	Sanuy, M., Duo, E., Jäger, W. S., Ciavola, P., & Jiménez, J. A. (2018). Linking source with consequences of coastal storm impacts for climate change and risk reduction scenarios for Mediterranean sandy beaches. Natural Hazards and Earth System Sciences, 18(7), 1825-1847.
Sanuy et al. 2019	Sensitivity of Storm-Induced Hazards in a Highly Curvilinear Coastline to Changing Storm Directions. The Tordera Delta Case (NW Mediterranean)	Coastal risk assessment	Spain	NA	Sanuy, M., & Jiménez, J. A. (2019). Sensitivity of storm-induced hazards in a highly curvilinear coastline to changing storm directions. The Tordera delta case (NW Mediterranean). Water, 11(4), 747.
Sarkar et al. 2022	A literature review on the methods for climate related coastal risk assessment in the Mediterranean region	Coastal risk assessment	MED	IPCC, COPERNICUS, NASA	Sarkar, N., Rizzo, A., & Soldati, M. (2022). A literature review on the methods for climate related coastal risk assessment in the Mediterranean region. ICG2022, (ICG2022-144).
Satta et al. 2014	An Index-based method to assess vulnerabilities and risks of Mediterranean coastal zones to multiple hazards	Coastal risk assessment	MED	IPCC	Satta, A. (2014). An index-based method to assess vulnerabilities and risks of Mediterranean coastal zones to multiple hazards.
Sayol et al. 2018	Assessing Flood Risk Under Sea Level Rise and Extreme Sea Levels Scenarios: Application to the Ebro Delta (Spain)	Coastal risk assessment	Spain	IPCC	Sayol, J. M., & Marcos, M. (2018). Assessing flood risk under sea level rise and extreme sea levels scenarios: application to the ebro delta (Spain). Journal of Geophysical Research: Oceans, 123(2), 794-811.
Scorzini et al. 2017	Flood damage curves: new insights from the 2010 ﬂood in Veneto, Italy	Coastal risk assessment	Italy	NA	Scorzini, A. R., & Frank, E. (2017). Flood damage curves: new insights from the 2010 flood in Veneto, Italy. Journal of Flood Risk Management, 10(3), 381-392.
Bevacqua et al. 2019	Higher probability of compound flooding from precipitation and storm surge in Europe under anthropogenic climate change	Coastal risk assessment	MED	IPCC	Bevacqua, E., Maraun, D., Vousdoukas, M. I., Voukouvalas, E., Vrac, M., Mentaschi, L., & Widmann, M. (2019). Higher probability of compound flooding from precipitation and storm surge in Europe under anthropogenic climate change. Science advances, 5(9), eaaw5531.
Torresan et al. 2010	Risk assessment and decision support tools for the integrated evaluation of climate change impacts on coastal zones	Coastal risk assessment	Italy	IPCC	Torresan, S., Zabeo, A., Rizzi, J., Critto, A., Pizzol, L., Giove, S., & Marcomini, A. (2010). Risk assessment and decision support tools for the integrated evaluation of climate change impacts on coastal zones.
Van Dongeren et al. 2018	Introduction to RISC-KIT: Resilience-increasing strategies for coasts	Coastal risk assessment	MED	NA	Van Dongeren, A., Ciavola, P., Martinez, G., Viavattene, C., Bogaard, T., Ferreira, O., ... & McCall, R. (2018). Introduction to RISC-KIT: Resilience-increasing strategies for coasts. Coastal Engineering, 134, 2-9.
Vousdoukas et al. 2016	Developments in large-scale coastal ﬂood hazard mapping	Coastal risk assessment	MED	NA	Vousdoukas, M. I., Voukouvalas, E., Mentaschi, L., Dottori, F., Giardino, A., Bouziotas, D., ... & Feyen, L. (2016). Developments in large-scale coastal flood hazard mapping. Natural Hazards and Earth System Sciences, 16(8), 1841-1853.
Wolff et al. 2018	A Mediterranean coastal database for assessing the impacts of sea-level rise and associated hazards	Coastal risk assessment	MED	NASA	Wolff, C., Vafeidis, A. T., Muis, S., Lincke, D., Satta, A., Lionello, P., ... & Hinkel, J. (2018). A Mediterranean coastal database for assessing the impacts of sea-level rise and associated hazards. Scientific data, 5(1), 1-11.
Antonioli et al. 2017	Sea level rise and potential drowning of the Italian coastal plain : Flooding risk scenarios for 2100	Coastal Vulnerability assessment	Italy	IPCC	Antonioli, F., Anzidei, M., Amorosi, A. L. E. S. S. A. N. D. R. O., Presti, V. L., Mastronuzzi, G., Deiana, G., ... & Vecchio, A. (2017). Sea-level rise and potential drowning of the Italian coastal plains: Flooding risk scenarios for 2100. Quaternary Science Reviews, 158, 29-43.
Anzidei et al. 2018	Coastal retreat and marine flooding scenario for 2100: a case study along the coast of Maddalena peninsula (southeastern Sicily)	Coastal Vulnerability assessment	Italy	IPCC	Anzidei, M., Scicchitano, G., Tarascio, S., De Guidi, G., Monaco, C., Barreca, G., ... & Vecchio, A. (2018). Coastal retreat and marine flooding scenario for 2100: A case study along the coast of Maddalena Peninsula (southeastern Sicily). Geogr. Fis. Din. Quat, 41, 5-16.
Armaroli et al. 2012	Critical storm thresholds for significant morphological changes and damage along the Emilia-Romagna coastline	Coastal Vulnerability assessment	Italy	NA	Armaroli, C., Ciavola, P., Perini, L., Calabrese, L., Lorito, S., Valentini, A., & Masina, M. (2012). Critical storm thresholds for significant morphological changes and damage along the Emilia-Romagna coastline, Italy. Geomorphology, 143, 34-51.
Aucelli et al. 2018	Present day and future scenarios of coastal erosion and flooding processes along the Italian Adriatic coast: the case of Molise region	Coastal Vulnerability assessment	Italy	IPCC	Aucelli, P. P., Di Paola, G., Rizzo, A., & Rosskopf, C. M. (2018). Present day and future scenarios of coastal erosion and flooding processes along the Italian Adriatic coast: the case of Molise region. Environmental Earth Sciences, 77(10), 1-19.
Anfuso et al. 2021	Coastal Sensitivity/Vulnerability Characterization and Adaptation Strategies: A Review	Coastal Vulnerability assessment	MED	IPCC	Anfuso, G., Postacchini, M., Di Luccio, D., & Benassai, G. (2021). Coastal sensitivity/vulnerability characterization and adaptation strategies: A review. Journal of Marine Science and Engineering, 9(1), 72.
Batzakis et al. 2020	Assessment of Building Vulnerability to Tsunami Hazard in Kamari (Santorini Island, Greece)	Coastal Vulnerability assessment	Greece	NA	Batzakis, D. V., Misthos, L. M., Voulgaris, G., Tsanakas, K., Andreou, M., Tsodoulos, I., & Karymbalis, E. (2020). Assessment of building vulnerability to tsunami hazard in Kamari (Santorini Island, Greece). Journal of Marine Science and Engineering, 8(11), 886.
Benavente et al. 2006	Coastal flooding hazard related to storms and coastal evolution in Valdelagrana spit ( Cadiz Bay Natural Park, SW Spain)	Coastal Vulnerability assessment	Spain	NA	Benavente, J., Del Río, L., Gracia, F. J., & Martínez-del-Pozo, J. A. (2006). Coastal flooding hazard related to storms and coastal evolution in Valdelagrana spit (Cadiz Bay Natural Park, SW Spain). Continental Shelf Research, 26(9), 1061-1076.
Bonaldo et al. 2019	Integrating multidisciplinary instruments for assessing coastal vulnerability to erosion and sea level rise: lessons and challenges from the Adriatic Sea, Italy	Coastal Vulnerability assessment	Italy	IPCC	Bonaldo, D., Antonioli, F., Archetti, R., Bezzi, A., Correggiari, A., Davolio, S., ... & Carniel, S. (2019). Integrating multidisciplinary instruments for assessing coastal vulnerability to erosion and sea level rise: Lessons and challenges from the Adriatic Sea, Italy. Journal of coastal conservation, 23(1), 19-37.
Bosom et al. 2011	Probabilistic coastal vulnerability assessment to storms at regional scale – application to Catalan beaches (NW Mediterranean)	Coastal Vulnerability assessment	Spain	NA	Bosom, E., & Jiménez, J. A. (2011). Probabilistic coastal vulnerability assessment to storms at regional scale–application to Catalan beaches (NW Mediterranean). Natural hazards and Earth system sciences, 11(2), 475-484.
Boumboulis et al. 2021	The Importance of Geotechnical Evaluation and Shoreline Evolution in Coastal Vulnerability Index Calculations	Coastal Vulnerability assessment	Greece	IPCC	Boumboulis, V., Apostolopoulos, D., Depountis, N., & Nikolakopoulos, K. (2021). The importance of geotechnical evaluation and shoreline evolution in coastal vulnerability index calculations. Journal of Marine Science and Engineering, 9(4), 423.
DiPaola et al. 2018	Coastal subsidence detected by Synthetic Aperture Radar interferometry and its effects coupled with future sea-level rise: the case of the Sele Plain (Southern Italy)	Coastal Vulnerability assessment	Italy	IPCC	Di Paola, G., Alberico, I., Aucelli, P. P. C., Matano, F., Rizzo, A., & Vilardo, G. (2018). Coastal subsidence detected by Synthetic Aperture Radar interferometry and its effects coupled with future sea‐level rise: the case of the Sele Plain (Southern Italy). Journal of Flood Risk Management, 11(2), 191-206.
Enriquez et al. 2019	Assessing beach and dune erosion and vulnerability under sea level rise: A case study in the Mediterranean sea	Coastal Vulnerability assessment	Spain	IPCC	Enríquez, A. R., Marcos, M., Falqués, A., & Roelvink, D. (2019). Assessing beach and dune erosion and vulnerability under sea level rise: a case study in the Mediterranean Sea. Frontiers in Marine Science, 6, 4.
Faour et al. 2013	GIS-Based Approach to the Assessment of Coastal Vulnerability to Sea Level Rise: Case Study on the Eastern Mediterranean	Coastal Vulnerability assessment	Syria	NA	Faour, G., Fayad, A., & Mhawej, M. (2013). GIS-based approach to the assessment of coastal vulnerability to sea level rise: Case study on the eastern mediterranean. Journal of Surveying and Mapping Engineering, 1(3), 41-48.
Felsenstein et al. 2014	Social and economic vulnerability of coastal communities to sea-level rise and extreme ﬂooding	Coastal Vulnerability assessment	Israeli	IPCC	Felsenstein, D., & Lichter, M. (2014). Social and economic vulnerability of coastal communities to sea-level rise and extreme flooding. Natural hazards, 71(1), 463-491.
Furlan et al. 2021	Development of a Multi-Dimensional Coastal Vulnerability Index:	Coastal Vulnerability assessment	Italy	IPCC	Furlan, E., Dalla Pozza, P., Michetti, M., Torresan, S., Critto, A., & Marcomini, A. (2021). Development of a Multi-Dimensional Coastal Vulnerability Index: assessing vulnerability to inundation scenarios in the Italian coast. Science of the Total Environment, 772, 144650.
	Assessing vulnerability to inundation scenarios in the Italian coast
Gaki-Papanastassiou et al. 2010	Coastal vulnerability assessment to sea-level rise bαsed on geomorphological and oceanographical parameters: the case of Argolikos Gulf, Peloponnese, Greece	Coastal Vulnerability assessment	Greece	IPCC	Gaki-Papanastassiou, K., Karymbalis, E., Poulos, S. E., Seni, A., & Zouva, C. (2010). Coastal vulnerability assessment to sea-level rise bαsed on geomorphological and oceanographical parameters: the case of Argolikos Gulf, Peloponnese, Greece. Hellenic Journal of Geosciences, 45(45), 109-122.
Hereher et al. 2015	Coastal vulnerability assessment for Egypt's Mediterranean coast	Coastal Vulnerability assessment	Egypt	NA	Hereher, M. E. (2015). Coastal vulnerability assessment for Egypt's Mediterranean coast. Geomatics, Natural Hazards and Risk, 6(4), 342-355.
Jimenez et al. 2009	Geomorphic coastal vulnerability to storms in microtidal fetch-limited environments: Application to NW Mediterranean and North Adriatic sea	Coastal Vulnerability assessment	Italy, France, Spain	NA	Jimenez, J. A., Ciavola, P., Balouin, Y., Armaroli, C., Bosom, E., & Gervais, M. (2009). Geomorphic coastal vulnerability to storms in microtidal fetch-limited environments: application to NW Mediterranean & N Adriatic Seas. Journal of Coastal Research, 56, 1641-1645.
Jimenez et al. 2012	Storm-induced damages along the Catalan coast (NW Mediterranean) during the period 1958–2008	Coastal Vulnerability assessment	Spain	NA	Jiménez, J. A., Sancho-García, A., Bosom, E., Valdemoro, H. I., & Guillén, J. (2012). Storm-induced damages along the Catalan coast (NW Mediterranean) during the period 1958–2008. Geomorphology, 143, 24-33.
khouakhi et al. 2013	Vulnerability assessment of Al Hoceima bay (Moroccan Mediterranean coast): a coastal management tool to reduce potential impacts of sea-level rise and storm surges	Coastal Vulnerability assessment	Morocco	IPCC	Khouakhi, A., Snoussi, M., Niazi, S., & Raji, O. (2013). Vulnerability assessment of Al Hoceima bay (Moroccan Mediterranean coast): a coastal management tool to reduce potential impacts of sea-level rise and storm surges. Journal of Coastal Research, (65 (10065)), 968-973.
Mavromatidi et al. 2018	Mapping and analyzing socio-environmental vulnerability to coastal hazards induced by climate change: An application to coastal Mediterranean cities in France	Coastal Vulnerability assessment	France	NASA	Mavromatidi, A., Briche, E., & Claeys, C. (2018). Mapping and analyzing socio-environmental vulnerability to coastal hazards induced by climate change: An application to coastal Mediterranean cities in France. Cities, 72, 189-200.
Monioudi et al. 2016	Assessment of vulnerability of the eastern Cretan beaches (Greece) to sea level rise	Coastal Vulnerability assessment	France	IPCC	Monioudi, I. N., Karditsa, A., Chatzipavlis, A., Alexandrakis, G., Andreadis, O. P., Velegrakis, A. F., ... & Marinos, E. (2016). Assessment of vulnerability of the eastern Cretan beaches (Greece) to sea level rise. Regional environmental change, 16(7), 1951-1962.
Pantusa et al. 2018	Application of a Coastal Vulnerability Index. A Case Study along the Apulian Coastline, Italy	Coastal Vulnerability assessment	Italy	IPCC	Pantusa, D., D’Alessandro, F., Riefolo, L., Principato, F., & Tomasicchio, G. R. (2018). Application of a coastal vulnerability index. A case study along the Apulian Coastline, Italy. Water, 10(9), 1218.
Papoulini et al. 2013	Assessment of the susceptibility of the coast of Astypalaea island (s.e. aegean sea) to sea level rise	Coastal Vulnerability assessment	Greece	IPCC	Παπούλια, Μ., Καρυμπάλης, Ε., Γκάκη-Παπαναστασίου, Κ., & Μαρουκιάν, Χ. (2013). Assessment of the susceptibility of the coast of Astypalaea island (SE Aegean sea) to sea-level rise. Δελτίον της Ελληνικής Γεωλογικής Εταιρίας, 47(1), 305-314.
Pikelj et al. 2013	Eastern Adriatic Coast (EAC): Geomorphology and Coastal Vulnerability of a Karstic Coast	Coastal Vulnerability assessment	Italy	IPCC	Pikelj, K., & Juračić, M. (2013). Eastern Adriatic Coast (EAC): geomorphology and coastal vulnerability of a karstic coast. Journal of coastal research, 29(4), 944-957.
Rizzo et al. 2020	Coastal Vulnerability Assessment along the North-Eastern Sector of Gozo Island (Malta, Mediterranean Sea)	Coastal Vulnerability assessment	Malta	IPCC	Rizzo, A., Vandelli, V., Buhagiar, G., Micallef, A. S., & Soldati, M. (2020). Coastal vulnerability assessment along the north-eastern sector of Gozo Island (Malta, Mediterranean Sea). Water, 12(5), 1405.
Sanuy et al. 2019	Sensitivity of Storm-Induced Hazards in a Highly Curvilinear Coastline to Changing Storm Directions. The Tordera Delta Case (NW Mediterranean	Coastal Vulnerability assessment	Spain	NA	Sanuy, M., & Jiménez, J. A. (2019). Sensitivity of storm-induced hazards in a highly curvilinear coastline to changing storm directions. The Tordera delta case (NW Mediterranean). Water, 11(4), 747.
Satta et al. 2017	Assessment of coastal risks to climate change related impacts at the regional scale: The case of the Mediterranean region	Coastal Vulnerability assessment	MED	IPCC	Satta, A., Puddu, M., Venturini, S., & Giupponi, C. (2017). Assessment of coastal risks to climate change related impacts at the regional scale: The case of the Mediterranean region. International journal of disaster risk reduction, 24, 284-296.
Sekovski et al. 2020	Development of a coastal vulnerability index using analytical hierarchy process and application to Ravenna province (Italy)	Coastal Vulnerability assessment	Italy	IPCC	Sekovski, I., Del Río, L., & Armaroli, C. (2020). Development of a coastal vulnerability index using analytical hierarchy process and application to Ravenna province (Italy). Ocean & Coastal Management, 183, 104982.
Tragaki et al. 2018	Coastal Hazard Vulnerability Assessment Based on Geomorphic, Oceanographic and Demographic Parameters: The Case of the Peloponnese (Southern Greece)	Coastal Vulnerability assessment	Greece	NA	Tragaki, A., Gallousi, C., & Karymbalis, E. (2018). Coastal hazard vulnerability assessment based on geomorphic, oceanographic and demographic parameters: The case of the Peloponnese (Southern Greece). Land, 7(2), 56.
Zampazas et al. 2022	Assessment of the sensitivity of Zakynthos Island (Ionian Sea, Western Greece) to climate change-induced coastal hazards	Coastal Vulnerability assessment	Greece	NA	Zampazas, G., Karymbalis, E., & Chalkias, C. (2021). Assessment of the sensitivity of Zakynthos Island (Ionian Sea, Western Greece) to climate change-induced coastal hazards. Zeitschrift für Geomorphologie.
Androulidakis et al. 2015	Storm surges in the Mediterranean Sea: Variability and trends under future climatic conditions	Model based approach	MED	IPCC	Androulidakis, Y. S., Kombiadou, K. D., Makris, C. V., Baltikas, V. N., & Krestenitis, Y. N. (2015). Storm surges in the Mediterranean Sea: Variability and trends under future climatic conditions. Dynamics of Atmospheres and Oceans, 71, 56-82.
Adloff et al. 2018	Improving sea level simulation in Mediterranean regional climate models	Model based approach	MED	NA	Adloff, F., Jordà, G., Somot, S., Sevault, F., Arsouze, T., Meyssignac, B., ... & Planton, S. (2018). Improving sea level simulation in Mediterranean regional climate models. Climate dynamics, 51(3), 1167-1178.
Antonioli et al. 2017	Sea-level rise and potential drowning of the Italian coastal plains: Flooding risk scenarios for 2100	Model based approach	Italy	IPCC	Antonioli, F., Anzidei, M., Amorosi, A. L. E. S. S. A. N. D. R. O., Presti, V. L., Mastronuzzi, G., Deiana, G., ... & Vecchio, A. (2017). Sea-level rise and potential drowning of the Italian coastal plains: Flooding risk scenarios for 2100. Quaternary Science Reviews, 158, 29-43.
Anzidei et al. 2021	Relative Sea-Level Rise Scenario for 2100 along the Coast of South Eastern Sicily(Italy)by InSAR Data, Satellite Images and High-Resolution Topography	Model based approach	Italy	IPCC	Anzidei, M., Scicchitano, G., Scardino, G., Bignami, C., Tolomei, C., Vecchio, A., ... & Mastronuzzi, G. (2021). Relative sea-level rise scenario for 2100 along the coast of south eastern sicily (Italy) by InSAR data, satellite images and high-resolution topography. Remote Sensing, 13(6), 1108.
Barnett et al. 2020	Nonlinear landscape and cultural response to sea-level rise	Model based approach	Italy	NA	Barnett, R. L., Charman, D. J., Johns, C., Ward, S. L., Bevan, A., Bradley, S. L., ... & Stevens, T. (2020). Nonlinear landscape and cultural response to sea-level rise. Science advances, 6(45), eabb6376.
Bergillos et al. 2019	Wave farm impacts on coastal ﬂooding under sea-level rise: A case study in southern Spain	Model based approach	Spain	IPCC	Bergillos, R. J., Rodriguez-Delgado, C., & Iglesias, G. (2019). Wave farm impacts on coastal flooding under sea-level rise: A case study in southern Spain. Science of the total environment, 653, 1522-1531.
Dean et al. 2022	See Level Viz: A simple data science tool for dynamic visualization of shoreline displacement caused by sea-level change	Model based approach	Croatia	NA	Dean, S., Bursten, S., Spada, G., & Pappalardo, M. (2022). SeeLevelViz: A simple data science tool for dynamic visualization of shoreline displacement caused by sea-level change. Quaternary International.
Dumitru et al. 2021	Sea‑level stands from the Western Mediterranean over the past 6.5 million years	Model based approach	Spain	IPCC	Dumitru, O. A., Austermann, J., Polyak, V. J., Fornós, J. J., Asmerom, Y., Ginés, J., ... & Onac, B. P. (2021). Sea-level stands from the Western Mediterranean over the past 6.5 million years. Scientific reports, 11(1), 1-10.
Galassi et al. 2014	Sea level rise in the Mediterrnean sea by 2050: Roles of terrestial ice-melt, steric effects and glacial isostatic adjustments	Model based approach	MED	IPCC	Galassi, G., & Spada, G. (2014). Sea-level rise in the Mediterranean Sea by 2050: Roles of terrestrial ice melt, steric effects and glacial isostatic adjustment. Global and Planetary Change, 123, 55-66.
Lambeck et al. 2005	Sea-level change in the Mediterranean Sea since the LGM: model predictions for tectonically stable areas	Model based approach	Italy	IPCC	Lambeck, K., & Purcell, A. (2005). Sea-level change in the Mediterranean Sea since the LGM: model predictions for tectonically stable areas. Quaternary Science Reviews, 24(18-19), 1969-1988.
Letetrel et al. 2010	Sea level extremes in Marseille (NW Mediterranean) during 1885–2008	Model based approach	France	IPCC	Letetrel, C., Marcos, M., Míguez, B. M., & Woppelmann, G. (2010). Sea level extremes in Marseille (NW Mediterranean) during 1885–2008. Continental Shelf Research, 30(12), 1267-1274.
Lin-Ye et al. 2020	Modeling of Future Extreme Storm Surges at the NW Mediterranean Coast (Spain)	Model based approach	Spain	NA	Lin-Ye, J., García-León, M., Gràcia, V., Ortego, M. I., Lionello, P., Conte, D., ... & Sánchez-Arcilla, A. (2020). Modeling of future extreme storm surges at the NW mediterranean coast (Spain). Water, 12(2), 472.
Lionello et al. 2020	The relation of climate extremes with global warming in the Mediterranean region and its north versus south contrast	Model based approach	MED	NA	Lionello, P., & Scarascia, L. (2020). The relation of climate extremes with global warming in the Mediterranean region and its north versus south contrast. Regional Environmental Change, 20(1), 1-16.
Lopez-Doriga et al. 2020	Impact of Relative Sea-Level Rise on Low-Lying Coastal Areas of Catalonia, NW Mediterranean, Spain	Model based approach	Spain	IPCC	López-Dóriga, U., & Jiménez, J. A. (2020). Impact of relative sea-level rise on low-lying coastal areas of catalonia, nw Mediterranean, Spain. Water, 12(11), 3252.
Marcos et al. 2008	Coastal sea level trends in Southern Europe	Model based approach	MED	IPCC	Marcos, M., & Tsimplis, M. N. (2008). Coastal sea level trends in Southern Europe. Geophysical Journal International, 175(1), 70-82.
Marsico et al. 2017	Flooding scenario for four Italian coastal plains using three relative sea level rise models	Model based approach	Italy	IPCC	Marsico, A., Lisco, S., Lo Presti, V., Antonioli, F., Amorosi, A., Anzidei, M., ... & Mastronuzzi, G. (2017). Flooding scenario for four Italian coastal plains using three relative sea level rise models. Journal of Maps, 13(2), 961-967.
Mohamed et al. 2019	Inter-Annual Variability and Trends of Sea Level and Sea Surface Temperature in the Mediterranean Sea over the Last 25 Years	Model based approach	MED	IPCC	Mohamed, B., Abdallah, A. M., Alam El-Din, K., Nagy, H., & Shaltout, M. (2019). Inter-annual variability and trends of sea level and sea surface temperature in the Mediterranean Sea over the last 25 years. Pure and Applied Geophysics, 176(8), 3787-3810.
Moron et al. 2005	Relationship between sea-level pressure and sea-level height in the Camargue (French Mediterranean coast)	Model based approach	France	IPCC	Moron, V., & Ullmann, A. (2005). Relationship between sea‐level pressure and sea‐level height in the Camargue (French Mediterranean coast). International Journal of Climatology: A Journal of the Royal Meteorological Society, 25(11), 1531-1540.
Perini et al. 2017	Sea-level rise along the Emilia-Romagna coast (Northern Italy) in 2100: scenarios and impacts	Model based approach	Italy	IPCC	Perini, L., Calabrese, L., Luciani, P., Olivieri, M., Galassi, G., & Spada, G. (2017). Sea-level rise along the Emilia-Romagna coast (Northern Italy) in 2100: scenarios and impacts. Natural Hazards and Earth System Sciences, 17(12), 2271-2287.
Reimann et al. 2018	Mediterranean UNESCO World Heritage at risk from coastal flooding and erosion due to sea-level rise	Model based approach	MED	IPCC	Reimann, L., Vafeidis, A. T., Brown, S., Hinkel, J., & Tol, R. S. (2018). Mediterranean UNESCO World Heritage at risk from coastal flooding and erosion due to sea-level rise. Nature communications, 9(1), 1-11.
Rohmer et al. 2019	Addressing ambiguity in probabilistic assessments of future coastal flooding using possibility distributions	Model based approach	France	IPCC	Rohmer, J., Le Cozannet, G., & Manceau, J. C. (2019). Addressing ambiguity in probabilistic assessments of future coastal flooding using possibility distributions. Climatic Change, 155(1), 95-109.
Rovere et al. 2012	Mediterranean sea-level change and projection for future flooding	Model based approach	MED	IPCC	Rovere, A., Furlani, S., Benjamin, J., Fontana, A., & Antonioli, F. (2012). MEDFLOOD: Mediterranean Sea-Level Change and Projection for Future Flooding. Journal of Alpine and Mediterranean Quaternary, 25(2), iii-vi.
Rovere et al. 2016	Eustatic and Relative Sea Level Changes	Model based approach	MED	IPCC	Rovere, A., Stocchi, P., & Vacchi, M. (2016). Eustatic and relative sea level changes. Current Climate Change Reports, 2(4), 221-231.
Sannino et al. 2022	Modelling present and future climate in the Mediterranean Sea: a focus on sea‑level change	Model based approach	Med	IPCC	Sannino, G., Carillo, A., Iacono, R., Napolitano, E., Palma, M., Pisacane, G., & Struglia, M. (2022). Modelling present and future climate in the Mediterranean Sea: a focus on sea-level change. Climate Dynamics, 1-35.
Scardino et al. 2020	Sea-Level Rise and Shoreline Changes Along an Open Sandy Coast: Case Study of Gulf of Taranto, Italy	Model based approach	Italy	IPCC	Scardino, G., Sabatier, F., Scicchitano, G., Piscitelli, A., Milella, M., Vecchio, A., ... & Mastronuzzi, G. (2020). Sea-level rise and shoreline changes along an open sandy coast: Case study of gulf of taranto, Italy. Water, 12(5), 1414.
Tsimplis et al. 2009	Sea level variability in the Mediterranean Sea during the 1990s on the basis of two 2d and one 3d model	Model based approach	MED	IPCC	Tsimplis, M., Marcos, M., Colin, J., Somot, S., Pascual, A., & Shaw, A. G. P. (2009). Sea level variability in the Mediterranean Sea during the 1990s on the basis of two 2d and one 3d model. Journal of Marine Systems, 78(1), 109-123.
Tsimplis et al. 2011	Multi-decadal sea level trends and land movements in the Mediterranean Sea with estimates of factors perturbing tide gauge data and cumulative uncertainties	Model based approach	MED	NA	Tsimplis, M., Spada, G., Marcos, M., & Flemming, N. (2011). Multi-decadal sea level trends and land movements in the Mediterranean Sea with estimates of factors perturbing tide gauge data and cumulative uncertainties. Global and Planetary Change, 76(1-2), 63-76.
Tuel et al. 2020	Why Is the Mediterranean a Climate Change Hot Spot?	Model based approach	MED	NA	Tuel, A., & Eltahir, E. A. (2020). Why is the Mediterranean a climate change hot spot?. Journal of Climate, 33(14), 5829-5843.
Vacchi et al. 2016	Multi-proxy assessment of Holocene relative sea-level changes in the Western Mediterranean: Sea-level variability and impovements in the defination of the isostatic signal	Model based approach	Spain, France, Italy, Malta, Tunisia, Croatia, Slovenia	NA	Vacchi, M., Marriner, N., Morhange, C., Spada, G., Fontana, A., & Rovere, A. (2016). Multiproxy assessment of Holocene relative sea-level changes in the western Mediterranean: Sea-level variability and improvements in the definition of the isostatic signal. Earth-Science Reviews, 155, 172-197.
Vacchi et al. 2018	New relative sea level insights into the isostatic history of the Western Mediterranean	Model based approach	Spain, France, Italy	NA	Vacchi, M., Ghilardi, M., Melis, R. T., Spada, G., Giaime, M., Marriner, N., ... & Rovere, A. (2018). New relative sea-level insights into the isostatic history of the Western Mediterranean. Quaternary Science Reviews, 201, 396-408.
Alexandrakis et al. 2017	An assessment of the vulnerability to erosion of the coastal zone due to a potential rise of sea level: the case of the hellenic aegean coast	Index based approach	Greece	IPCC	Alexandrakis, G., Karditsa, A., Poulos, S., Ghionis, G., & Kampanis, N. A. (2010). An assessment of the vulnerability to erosion of the coastal zone due to a potential rise of sea level: The case of the Hellenic Aegean coast. Environmental Systems,[Ed. Achim Sydow], in Encyclopedia of Life Support Systems (EOLSS), Developed under the Auspices of the UNESCO, Eolss Publishers, Oxford, UK.
Aucelli et al. 2017	Coastal inundation risk assessment due to subsidence and sea level rise in a Mediteranean alluvial plain ( Volturo coastal plain- southern Italy)	Index based approach	Italy	IPCC	Aucelli, P. P. C., Di Paola, G., Incontri, P., Rizzo, A., Vilardo, G., Benassai, G., ... & Pappone, G. (2017). Coastal inundation risk assessment due to subsidence and sea level rise in a Mediterranean alluvial plain (Volturno coastal plain–southern Italy). Estuarine, Coastal and Shelf Science, 198, 597-609.
Ballesteros et al. 2018	A multi-component flood risk assessment in the Maresme coast (NW Mediterranean)	Index based approach	Spain	IPCC	Ballesteros, C., Jiménez, J. A., & Viavattene, C. (2018). A multi-component flood risk assessment in the Maresme coast (NW Mediterranean). Natural Hazards, 90(1), 265-292.
Benassai et al. 2015	Coastal risk assessment of a micro-tidal littoral plain in response to sea level rise	Index based approach	Italy	IPCC	Benassai, G., Di Paola, G., & Aucelli, P. P. C. (2015). Coastal risk assessment of a micro-tidal littoral plain in response to sea level rise. Ocean & Coastal Management, 104, 22-35.
Boumboulis et al. 2021	The Importance of Geotechnical Evaluation and Shoreline Evolution in Coastal Vulnerability Index Calculations	Index based approach	Greece	IPCC	Boumboulis, V., Apostolopoulos, D., Depountis, N., & Nikolakopoulos, K. (2021). The importance of geotechnical evaluation and shoreline evolution in coastal vulnerability index calculations. Journal of Marine Science and Engineering, 9(4), 423.
Bruno et al. 2020	The DPSIR Approach for Coastal Risk Assessment under Climate Change at Regional Scale: The Case of Apulian Coast (Italy)	Index based approach	Italy	IPCC	Bruno, M. F., Saponieri, A., Molfetta, M. G., & Damiani, L. (2020). The DPSIR approach for coastal risk assessment under climate change at regional scale: The case of apulian coast (Italy). Journal of Marine Science and Engineering, 8(7), 531.
Faour et al. 2013	GIS-Based Approach to the Assessment of Coastal Vulnerability to Sea Level Rise: Case Study on the Eastern Mediterranean	Index based approach	Italy	IPCC	Faour, G., Fayad, A., & Mhawej, M. (2013). GIS-based approach to the assessment of coastal vulnerability to sea level rise: Case study on the eastern mediterranean. Journal of Surveying and Mapping Engineering, 1(3), 41-48.
Felsenstein et al. 2014	Social and economic vulnerability of coastal communities to sea-level rise and extreme ﬂooding	Index based approach	Israeli	IPCC	Felsenstein, D., & Lichter, M. (2014). Social and economic vulnerability of coastal communities to sea-level rise and extreme flooding. Natural hazards, 71(1), 463-491.
Gaki-Papanastassiou et al. 2010	Coastal vulnerability assessment to sea-level rise bαsed on geomorphological and oceanographical parameters: the case of Argolikos Gulf, Peloponnese, Greece	Index based approach	Greece	IPCC	Gaki-Papanastassiou, K., Karymbalis, E., Poulos, S. E., Seni, A., & Zouva, C. (2010). Coastal vulnerability assessment to sea-level rise bαsed on geomorphological and oceanographical parameters: the case of Argolikos Gulf, Peloponnese, Greece. Hellenic Journal of Geosciences, 45(45), 109-122.
Hereher et al. 2015	Coastal vulnerability assessment for Egypt's Mediterranean coast	Index based approach	Egypt	NA	Hereher, M. E. (2015). Coastal vulnerability assessment for Egypt's Mediterranean coast. Geomatics, Natural Hazards and Risk, 6(4), 342-355.
Karymbalis et al. 2012	Assessment of the Sensitivity of the Southern Coast of the Gulf of Corinth(Peloponnese, Greece) to Sea-level Rise	Index based approach	Greece	IPCC	Karymbalis, E., Chalkias, C., Chalkias, G., Grigoropoulou, E., Manthos, G., & Ferentinou, M. (2012). Assessment of the sensitivity of the southern coast of the Gulf of Corinth (Peloponnese, Greece) to sea-level rise. Central European Journal of Geosciences, 4(4), 561-577.
Koroglu et al. 2019	Comparison of Coastal Vulnerability Index applications for Barcelona Province	Index based approach	Spain	IPCC	Koroglu, A., Ranasinghe, R., Jiménez, J. A., & Dastgheib, A. (2019). Comparison of coastal vulnerability index applications for Barcelona Province. Ocean & coastal management, 178, 104799.
Mavromatidi et al. 2016	Assessment of susceptibility to sea-level rise in the coastal area of Pieria prefecture	Index based approach	Greece	NA	Mavromatidi, A., & Karymbalis, E. (2016). ASSESSMENT OF SUSCEPTIBILITY TO SΕA-LΕVEL RISE IN THE COASTAL AREA OF PIERIA PREFECTURE. Bulletin of the Geological Society of Greece, 50(3), 1721-1729.
Mavromatidi et al. 2018	Mapping and analyzing socio-environmental vulnerability tocoastal hazards induced by climate change: An application to coastal Mediterranean cities in France	Index based approach	France	IPCC	Mavromatidi, A., Briche, E., & Claeys, C. (2018). Mapping and analyzing socio-environmental vulnerability to coastal hazards induced by climate change: An application to coastal Mediterranean cities in France. Cities, 72, 189-200.
Pantusa et al. 2018	Application of a Coastal Vulnerability Index. A Case Study along the Apulian Coastline, Italy	Index based approach	Italy	IPCC	Pantusa, D., D’Alessandro, F., Riefolo, L., Principato, F., & Tomasicchio, G. R. (2018). Application of a coastal vulnerability index. A case study along the Apulian Coastline, Italy. Water, 10(9), 1218.
Rizzo et al. 2020	Coastal vulnerability assessment along the north-eastern sector of Gozo Island (Malta, Mediterranean Sea)	Index based approach	Malta	IPCC	Rizzo, A., Vandelli, V., Buhagiar, G., Micallef, A. S., & Soldati, M. (2020). Coastal vulnerability assessment along the north-eastern sector of Gozo Island (Malta, Mediterranean Sea). Water, 12(5), 1405.
Rizzo et al. 2022	Potential Sea Level Rise Inundation in the Mediterranean: From Susceptibility Assessment to Risk Scenarios for Policy Action	Index based approach	Malta	IPCC	Rizzo, A., Vandelli, V., Gauci, C., Buhagiar, G., Micallef, A. S., & Soldati, M. (2022). Potential Sea Level Rise Inundation in the Mediterranean: From Susceptibility Assessment to Risk Scenarios for Policy Action. Water, 14(3), 416.
Satta et al. 2014	An index-based method to assess vulnerabilities and risks of Mediterranean coastal zones to multiple hazards	Index based approach	MED	IPCC	Satta, A. (2014). An index-based method to assess vulnerabilities and risks of Mediterranean coastal zones to multiple hazards.
Satta et al. 2017	Assessment of coastal risks to climate change related impacts at the regional scale: The case of the Mediterranean region	Index based approach	MED	IPCC	Satta, A., Puddu, M., Venturini, S., & Giupponi, C. (2017). Assessment of coastal risks to climate change related impacts at the regional scale: The case of the Mediterranean region. International journal of disaster risk reduction, 24, 284-296.
Sekovski et al. 2020	Development of a coastal vulnerability index using analytical hierarchy process and application to Ravenna province (Italy)	Index based approach	Italy	IPCC	Sekovski, I., Del Río, L., & Armaroli, C. (2020). Development of a coastal vulnerability index using analytical hierarchy process and application to Ravenna province (Italy). Ocean & Coastal Management, 183, 104982.
Tragaki et al. 2018	Coastal Hazard Vulnerability Assessment Based on Geomorphic, Oceanographic and Demographic Parameters: The Case of the Peloponnese (Southern Greece)	Index based approach	Greece	NA	Tragaki, A., Gallousi, C., & Karymbalis, E. (2018). Coastal hazard vulnerability assessment based on geomorphic, oceanographic and demographic parameters: The case of the Peloponnese (Southern Greece). Land, 7(2), 56.
Zampazas et al. 2021	Assessment of the sensitivity of Zakynthos Island (Ionian Sea, Western Greece) to climate change-induced coastal hazards	Index based approach	Greece	IPCC	Zampazas, G., Karymbalis, E., & Chalkias, C. (2021). Assessment of the sensitivity of Zakynthos Island (Ionian Sea, Western Greece) to climate change-induced coastal hazards. Zeitschrift für Geomorphologie.
Anzidei et al. 2020	Sea Level Rise Scenario for 2100 A.D. in the Heritage Site of Pyrgi (Santa Severa, Italy)	Multidisciplianry approach	Italy	IPCC	Anzidei, M., Doumaz, F., Vecchio, A., Serpelloni, E., Pizzimenti, L., Civico, R., ... & Enei, F. (2020). Sea level rise scenario for 2100 AD in the heritage site of Pyrgi (Santa Severa, Italy). Journal of Marine Science and Engineering, 8(2), 64.
Anzidei et al. 2021	Relative Sea-Level Rise Scenario for 2100 along the Coast of SouthEastern Sicily (Italy) by InSAR Data, Satellite Images and High-Resolution Topography	Multidisciplianry approach	Italy	IPCC	Anzidei, M., Scicchitano, G., Scardino, G., Bignami, C., Tolomei, C., Vecchio, A., ... & Mastronuzzi, G. (2021). Relative sea-level rise scenario for 2100 along the coast of south eastern sicily (Italy) by InSAR data, satellite images and high-resolution topography. Remote Sensing, 13(6), 1108.
Bonaldo et al. 2019	Integrating multidisciplinary instruments for assessing coastal vulnerability to erosion and sea level rise: lessons and challenges from the Adriatic Sea, Italy	Multidisciplianry approach	Italy	IPCC	Bonaldo, D., Antonioli, F., Archetti, R., Bezzi, A., Correggiari, A., Davolio, S., ... & Carniel, S. (2019). Integrating multidisciplinary instruments for assessing coastal vulnerability to erosion and sea level rise: Lessons and challenges from the Adriatic Sea, Italy. Journal of coastal conservation, 23(1), 19-37.
Brunel et al. 2009	Potential influence of sea level rise in controlling shoreline position on the French Mediterranean coast	Multidisciplianry approach	France	IPCC	Brunel, C., & Sabatier, F. (2009). Potential influence of sea-level rise in controlling shoreline position on the French Mediterranean Coast. Geomorphology, 107(1-2), 47-57.
Duo et al. 2018	Local-scale post-event assessments with GPS and UAV-based quick-response surveys: a pilot case from the Emilia–Romagna (Italy) coast	Multidisciplianry approach	Italy	NA	Duo, E., Trembanis, A. C., Dohner, S., Grottoli, E., & Ciavola, P. (2018). Local-scale post-event assessments with GPS and UAV-based quick-response surveys: a pilot case from the Emilia–Romagna (Italy) coast. Natural Hazards and Earth System Sciences, 18(11), 2969-2989.
Evelpidou et al. 2010	Yria (western Naxos island, Greece): Sea level changes in Upper Holocene and palaeogeographical reconstruction	Multidisciplinary approach	Greece	NA	Evelpidou, N., Pavlopoulos, K., Vassilopoulos, A., Triantaphyllou, M., Vouvalidis, K., & Syrides, G. (2010). Yria (western Naxos island, Greece): Sea level changes in Upper Holocene and palaeogeographical reconstruction. Geodinamica Acta, 23(5-6), 233-240.
Evelpidou et al. 2019	Holocene paleogeographical reconstruction and relative sea level changes in the southeastern part of the island of Samos (Greece)	Multidisciplinary approach	Greece	NA	Evelpidou, N., Pavlopoulos, K., Vouvalidis, K., Syrides, G., Triantaphyllou, M., Karkani, A., & Paraschou, T. (2019). Holocene palaeogeographical reconstruction and relative sea-level changes in the southeastern part of the island of Samos (Greece). Comptes Rendus Geoscience, 351(6), 451-460.
Hinkel et al. 2009	Integrating knowledge to assess coastal vulnerability to sea level rise: The development of the DIVA tool	Multidisciplinary approach	MED	IPCC	Hinkel, J., & Klein, R. J. (2009). Integrating knowledge to assess coastal vulnerability to sea-level rise: The development of the DIVA tool. Global Environmental Change, 19(3), 384-395.
Karkani et al. 2017	Tracking shoreline evolution in central Cyclades (Greece) using beach rocks	Multidisciplianry approach	Greece	NA	Karkani, A., Evelpidou, N., Vacchi, M., Morhange, C., Tsukamoto, S., Frechen, M., & Maroukian, Η. (2017). Tracking shoreline evolution in central Cyclades (Greece) using beachrocks. Marine Geology, 388, 25-37.
*NA = Not applicable
